# Supplementary material for: Scanning the optoelectronic properties of Cs4CuxAg2−2xSb2Cl12 double perovskite nanocrystals: the role of Cu2+ content
Source: Royal Society of Chemistry journal article supplement (doi:10.1039/d1tc05647f), 2022-01-01
Supplement: d1tc05647f1.pdf [file d1tc05647f1.pdf]

## Supporting Information

### Scanning the Optoelectronic Properties of $\text{Cs}_4\text{Cu}_x\text{Ag}_{2-2x}\text{Sb}_2\text{Cl}_{12}$ Double Perovskite Nanocrystals: Role of $\text{Cu}^{2+}$ Content

Ye Zhang<sup>a</sup>, Ning Sui<sup>a,\*</sup>, Zihui Kang<sup>a</sup>, Xiangdong Meng<sup>c</sup>, Long Yuan<sup>c</sup>, Xianfeng Li<sup>a</sup> and  
Han-zhuang Zhang<sup>a</sup>, Jiaqi Zhang<sup>b,\*</sup> and Yinghui Wang<sup>a,\*</sup>

<sup>a</sup> Femtosecond Laser laboratory, Femtosecond Laser laboratory, Key Laboratory of Physics and  
Technology for Advanced Batteries, College of Physics, Jilin University, Changchun 130012, P. R. China.

**E-mail:** [yinghui\\_wang@jlu.edu.cn](mailto:yinghui_wang@jlu.edu.cn), [sui@jlu.edu.cn](mailto:sui@jlu.edu.cn)

<sup>b</sup> Key Laboratory of Automobile Materials, Ministry of Education, College of Materials Science and  
Engineering, Jilin University, Changchun 130012, China.

**E-mail:** [zhangjiaqi@jlu.edu.cn](mailto:zhangjiaqi@jlu.edu.cn).

<sup>c</sup> Key Laboratory of Functional Materials Physics and Chemistry of the Ministry of Education, Jilin Normal  
University, Changchun, P. R. China;

† These authors contributed equally to this work

## Section 1. Calculation Details of nonlinear absorption coefficient ( $\beta$ ) and the two-photon absorption cross section ( $\sigma$ )

The influence of the solvent nonlinearity could be excluded. The two-photon absorption (TPA) coefficient  $\beta$  of  $\text{Cs}_4\text{Cu}_x\text{Ag}_{2-2x}\text{Sb}_2\text{Cl}_{12}$  in toluene solvents can be obtained by fitting the experimental results with equation:<sup>1-3</sup>

$$T(z, S = 1) = \sum_{m=0}^{\infty} \frac{[-q_0(z, 0)]^m}{(m+1)^{3/2}}$$

where  $q_0(z) = \beta I_0 / (1 + z^2/z_0^2)$ ;  $z_0 = k\omega_0^2/2$  is the Rayleigh length,  $k = 2\pi/\lambda$  is the wave vector,  $\omega_0$  is beam waist radius of Gaussian pulse, and  $I_0$  is the pulse irradiance. The TPA coefficient  $\beta$  is related to the TPA cross section  $\sigma$  by using<sup>4</sup>

$$\sigma = \frac{\beta h\nu 10^3}{Nc}$$

where  $N$  is Avogadro's number,  $c$  is the concentration,  $h$  is Planck's constant, and  $\nu$  is the laser frequency. In this experiment, the concentration of  $\text{Cs}_4\text{Cu}_x\text{Ag}_{2-2x}\text{Sb}_2\text{Cl}_{12}$  is  $2.0 \times 10^{-5}$  ( $x = 0.60$ ),  $1.6 \times 10^{-5}$  ( $x = 0.75$ ),  $1.8 \times 10^{-5}$  ( $x = 0.90$ ) and  $1.9 \times 10^{-5}$  ( $x = 1.00$ ) M, respectively.  $\sigma$  is expressed in Göppert-Mayer units (GM), with  $1 \text{ GM} = 1 \times 10^{-50} \text{ cm}^4 \text{ s molecule}^{-1} \text{ photon}^{-1}$ .

## Section 2: Calculation of average numbers of absorbed photons $\langle N \rangle$ , absorption cross-section $\sigma$

The probability of a nanocrystal contains  $N$  excitons is described by Poisson distribution (Eq. S1):

$$P_N = \frac{e^{-\langle N \rangle} \times \langle N \rangle^N}{N!} \quad (\text{S1})$$

where  $\langle N \rangle$  is the average number of photons per nanocrystal and can be calculated by (Eq. S2):

$$\langle N \rangle = j\sigma \quad (\text{S2})$$

where  $\sigma$  is the absorption cross section, and  $j$  is incident photon density per pulse. We can calculate  $\sigma$  by (Eq. S3)

$$P_{max} = \sum_{N=1}^{\infty} P_N = 1 - P_0 = 1 - e^{-\langle N \rangle} = 1 - e^{-j\sigma} \quad (\text{S3})$$

$\sigma$  of NCs can be obtained by fitting the data with equation of  $1 - e^{-j\sigma}$  (solid line in Fig. 3b).

### Section 3. Table and Figure

Table S1. Fitting results for the XPS patterns of elements composition ratios for  $\text{Cs}_4\text{Cu}_x\text{Ag}_{2-x}\text{Sb}_2\text{Cl}_{12}$  perovskite NCs.

| <i>At. %</i> | <b>X = 0.60</b> | <b>X = 0.75</b> | <b>X = 0.90</b> | <b>X = 1.00</b> |
|--------------|-----------------|-----------------|-----------------|-----------------|
| <i>Cs</i>    | 21.25           | 22.14           | 20.89           | 18.8            |
| <i>Cu</i>    | 2.16            | 3.20            | 4.18            | 5.00            |
| <i>Ag</i>    | 2.89            | 2.01            | 0.93            | 0.00            |
| <i>Sb</i>    | 12.06           | 11.25           | 11.09           | 11.20           |
| <i>Cl</i>    | 61.20           | 60.89           | 62.70           | 63.50           |

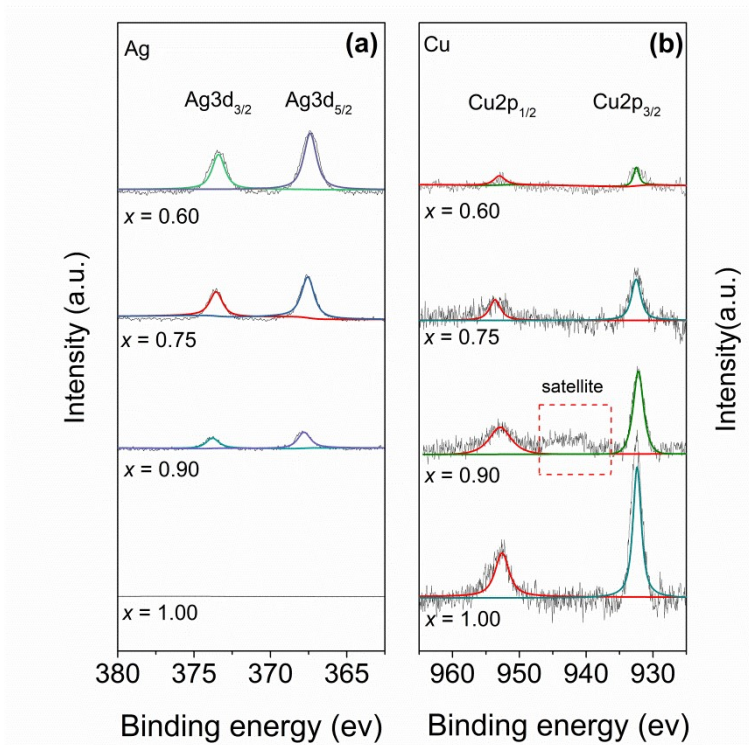

Fig. S1. XPS spectra of  $\text{Cs}_4\text{Cu}_x\text{Ag}_{2-2x}\text{Sb}_2\text{Cl}_{12}$  ( $x = 0.60, 0.75, 0.90$  and  $1.00$ ) samples for (a) Ag 3d and (b) Cu 2p signals, which is consistent with the previous report<sup>5</sup>. The spectra have calibrated using the Carbon 1s peak. The red square shows that the satellite peaks are located between 940 eV and 950 eV ( $x = 0.90$ ), suggesting that the  $\text{Cu}^{2+}$  really exists in our samples<sup>6</sup>.

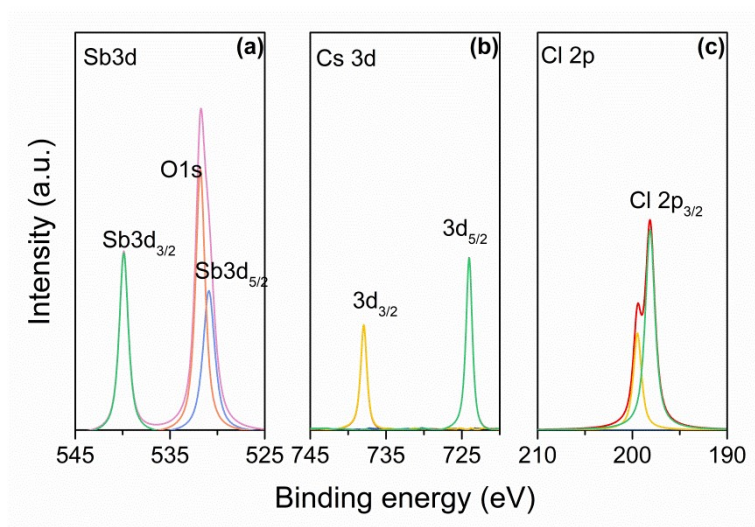

Fig. S2. The fitting XPS spectra for Cs 3d, Cl 2p and Sb 3d signals of  $\text{Cs}_4\text{CuSb}_2\text{Cl}_{12}$  NCs. The spectra have been calibrated using the Carbon 1s peak.

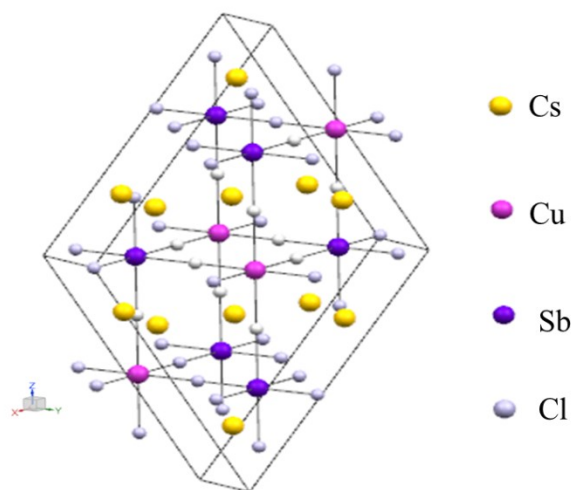

Fig. S3. Scheme of the atomic models for the Cs<sub>4</sub>CuSb<sub>2</sub>Cl<sub>12</sub> layered double perovskite.

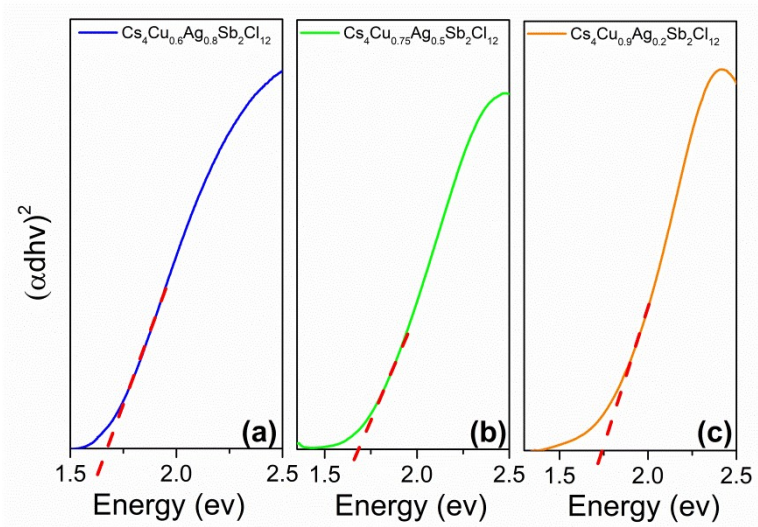

Fig. S4. Bandgaps of  $\text{Cs}_4\text{Cu}_x\text{Ag}_{2-2x}\text{Sb}_2\text{Cl}_{12}$  perovskite NCs ( $x = 0.60$  (a),  $0.75$  (b),  $0.90$  (c) from left to right) estimated by Tauc plot. Bandgap is extrapolated from the linear portion of the  $(\alpha d h\nu)^2$  versus the  $h\nu$  curve in the direct band gap Tauc plots, where  $\alpha$  is the absorption coefficient,  $d$  is the sample thickness, and  $h\nu$  is the photon energy.

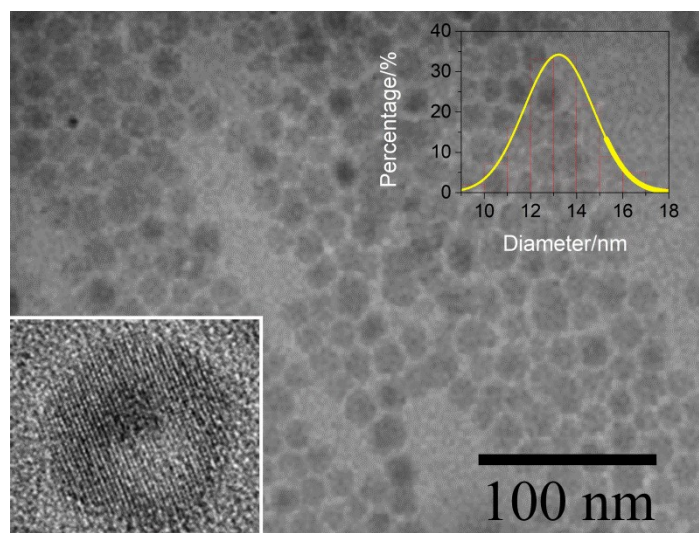

Fig. S5. TEM image of Cs<sub>4</sub>Cu<sub>x</sub>Ag<sub>2-2x</sub>Sb<sub>2</sub>Cl<sub>12</sub> perovskite NCs ( $x = 0.60$ ). Inset: HR-TEM imaging and size distribution image.



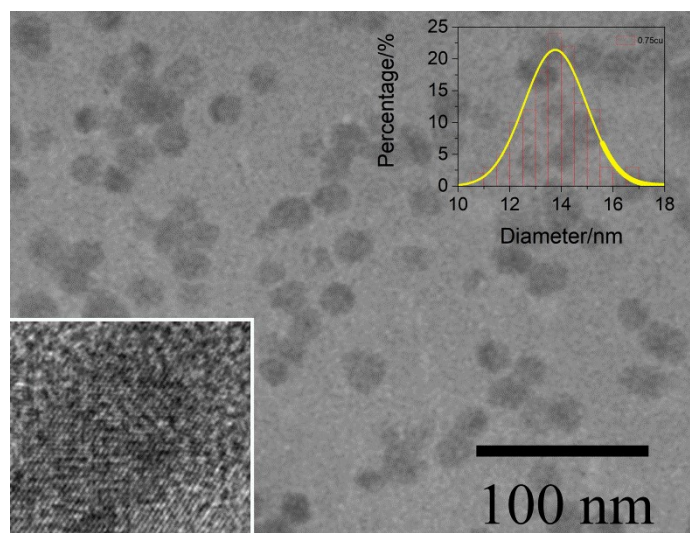

Fig. S6. TEM image of Cs<sub>4</sub>Cu<sub>x</sub>Ag<sub>2-2x</sub>Sb<sub>2</sub>Cl<sub>12</sub> perovskite NCs ( $x = 0.75$ ). Inset: HR-TEM imaging and size distribution image.

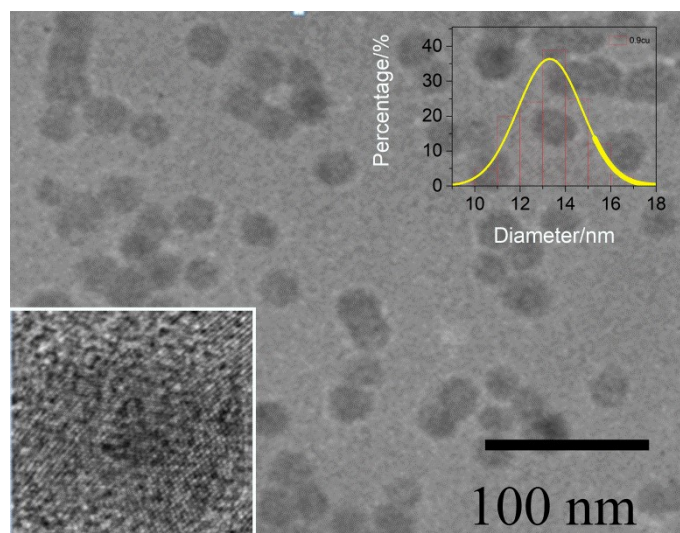

Fig. S7. TEM image of Cs<sub>4</sub>Cu<sub>x</sub>Ag<sub>2-2x</sub>Sb<sub>2</sub>Cl<sub>12</sub> perovskite NCs (x = 0.90). Inset: HR-TEM imaging and size distribution image.

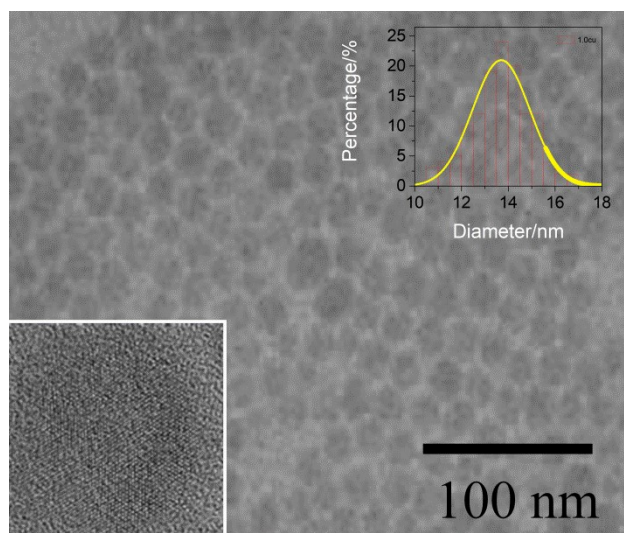

Fig. S8. TEM image of  $\text{Cs}_4\text{Cu}_x\text{Ag}_{2-2x}\text{Sb}_2\text{Cl}_{12}$  perovskite NCs ( $x = 1.00$ ). Inset: HR-TEM imaging and size distribution image.

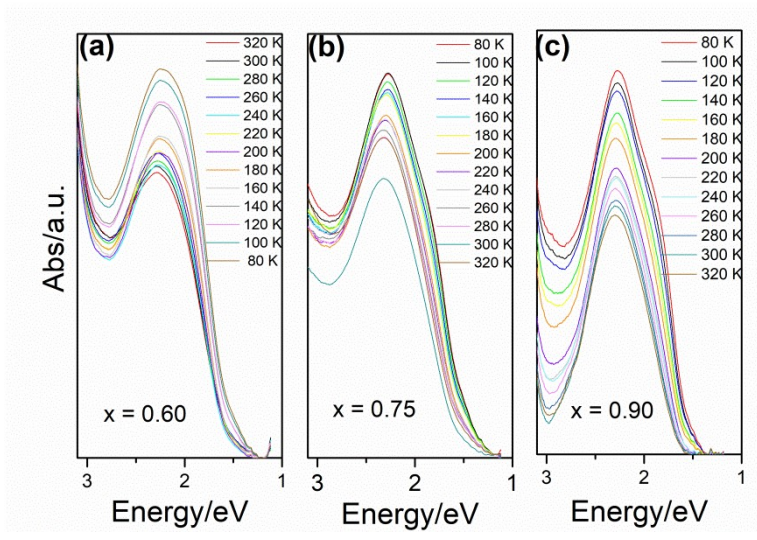

Fig. S9. Temperature-dependent absorption spectra of Cs<sub>4</sub>Cu<sub>x</sub>Ag<sub>2-2x</sub>Sb<sub>2</sub>Cl<sub>12</sub> perovskite NCs (x = 0.60 (a), 0.75 (b), 0.90 (c) from left to right).

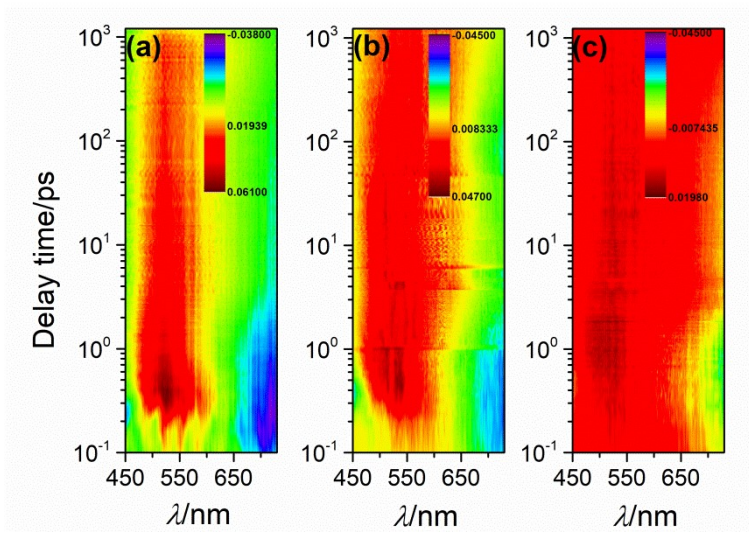

Fig. S10. Contour plot of the TA data of  $\text{Cs}_4\text{Cu}_x\text{Ag}_{2-2x}\text{Sb}_2\text{Cl}_{12}$  perovskite NCs ( $x = 0.90$  (a),  $0.75$  (b) and  $0.60$  (c) from left to right).

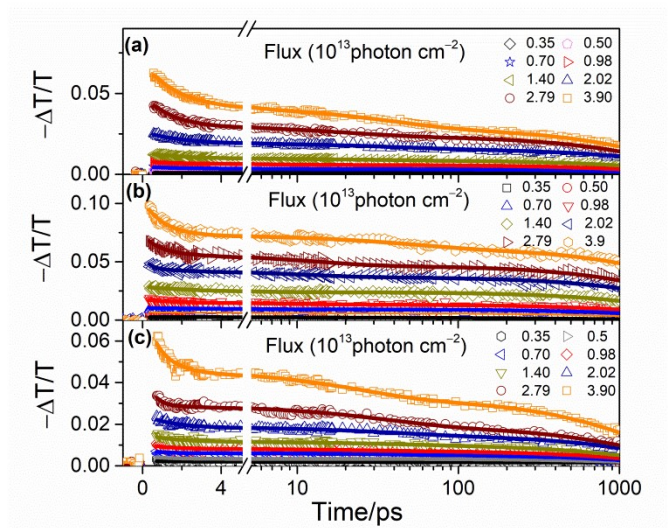

Fig. S11. Bleach kinetics of  $\text{Cs}_4\text{Cu}_x\text{Ag}_{2-2x}\text{Sb}_2\text{Cl}_{12}$  perovskite NCs ( $x = 0.90$  (a),  $0.75$  (b),  $0.60$  (c) from top to bottom) under various flux, in which the solid lines are the fits to the kinetic traces according to the carrier recombination model.

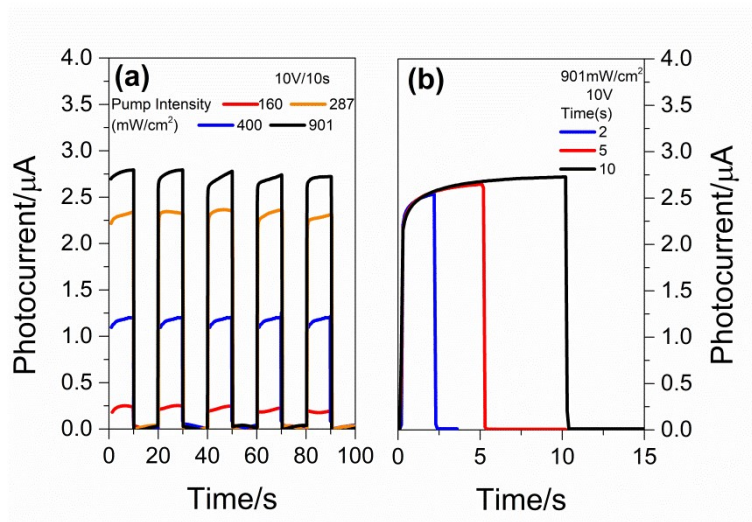

Fig. S12. Response-current of photodetector based on  $\text{Cs}_4\text{Cu}_{0.60}\text{Ag}_{0.80}\text{Sb}_2\text{Cl}_{12}$  NC as a function of pump intensities (a) and time (b).

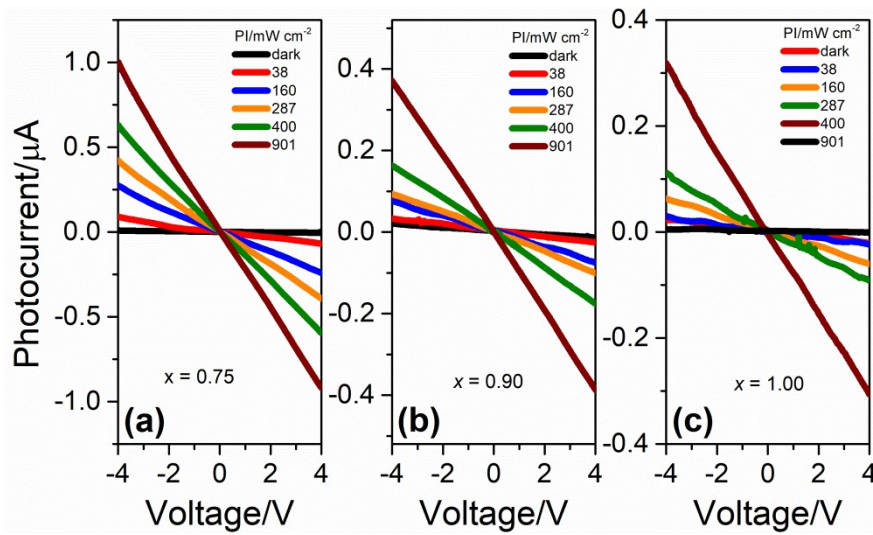

Fig. S13. I-V curve for varying intensities of  $\text{Cs}_4\text{Cu}_x\text{Ag}_{2-2x}\text{Sb}_2\text{Cl}_{12}$  perovskite NCs ( $x = 1.00$  (c), 0.90 (b), 0.75 (a) from right to left)



References:

1. Huang, T.-H., et al., *Opt. Mater.* 2013, **35**, 467-471.
2. Sheik-Bahae, M.; Said, A. A., *IEEE J. Quantum Electron.* 1990, **26**, 760-769.
3. Zhang, Y.; Wang, Q.; Sui, N.; Kang, Z.; Li, X.; Zhang, H.-z.; Zhang, J.; Wang, Y., *Appl. Phys. Lett.* 2021, **119**.
4. Ho-Wu, R.; Yau, S. H.; Goodson, T., *ACS Nano* 2016, **10**, 562-572.
5. Cai, T., et al., *J. Am. Chem. Soc.* 2020, **142**, 11927-11936.
6. P. P, A.; Joshi, M.; Verma, D.; Jadhav, S.; Choudhury, A. R.; Jana, D., *ACS Applied Nano Materials* 2021, **4**, 1305-1313.
